# Supplementary material for: Piperine ameliorates insulin resistance via inhibiting metabolic inflammation in monosodium glutamate-treated obese mice
Source: PubMed Central journal article supplement (PMC7542877; doi:10.1186/s12902-020-00617-1), 2020-10-07

# Anti-inflammatory effect of piperine ameliorates insulin resistance in monosodium glutamate–treated obese mice

Chaolong Liu<sup>1</sup>, Yanting Yuan<sup>1</sup>, Ji Zhou<sup>1</sup>, Ruixin Hu<sup>1</sup>, Lixia Ji<sup>1,\*,#</sup>, Guohui Jiang<sup>1,\*,#</sup>

\* Correspondences: Lixia Ji: [lixiaji@163.com](mailto:lixiaji@163.com); Guohui Jiang: [13370830026@163.com](mailto:13370830026@163.com)

# Lixia Ji and Guohui Jiang contributed equally to this work

1 School of Pharmacy, Qingdao University, Qingdao, Shandong 266021, China

# Figure S1. The original, unprocessed gel images

Original multiple exposure CD11c images

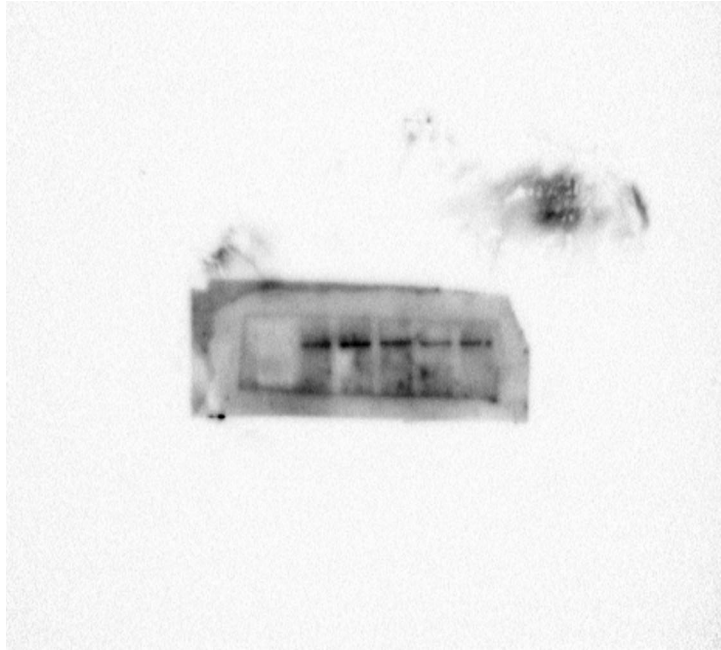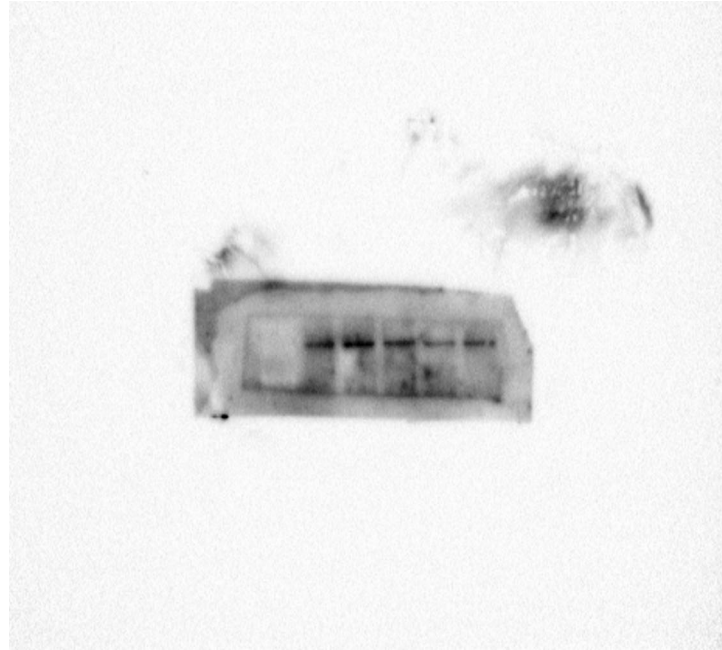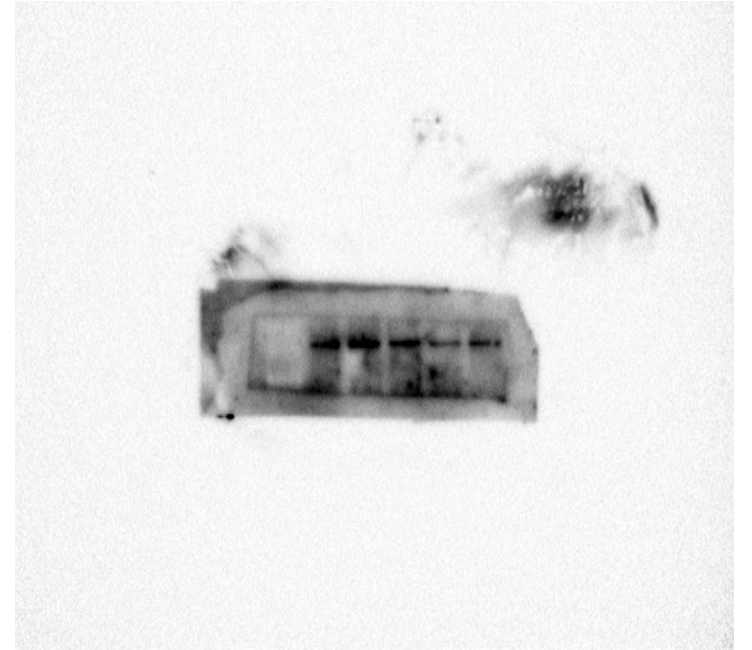

# Original multiple exposure GAPDH-1 images

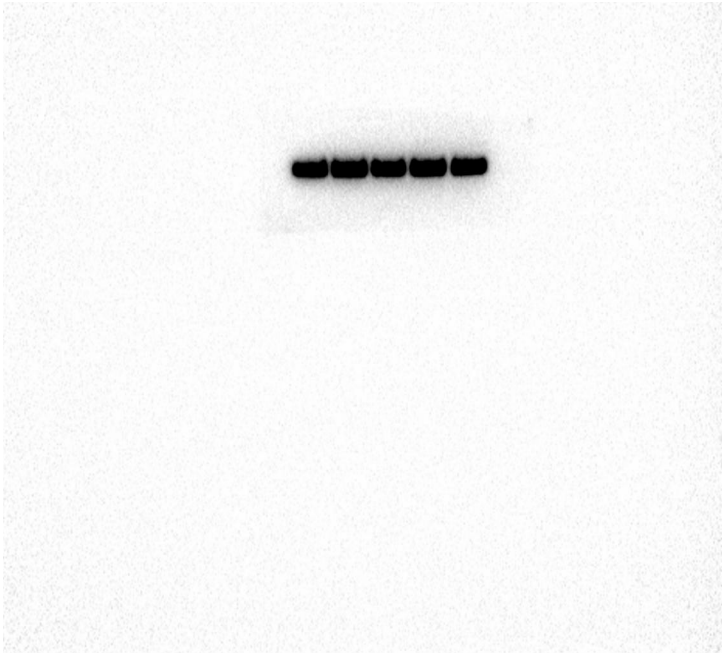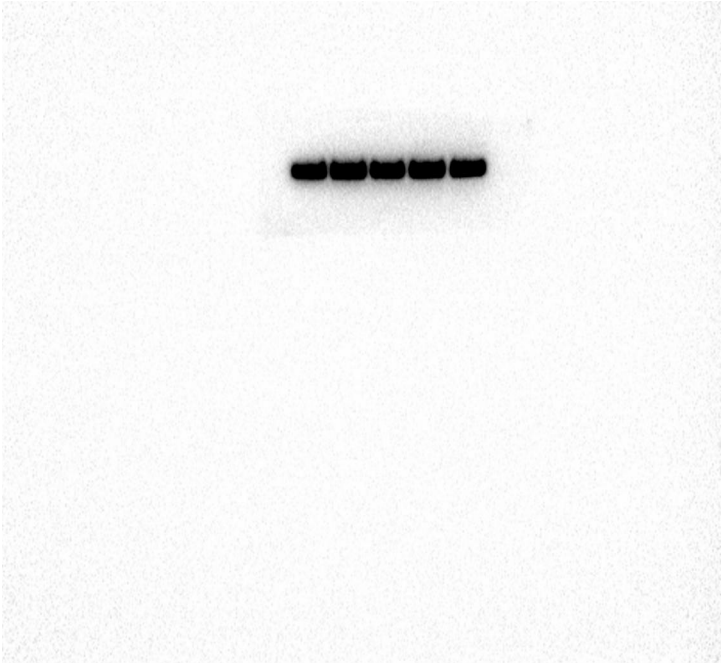

# Original multiple exposure GAPDH-2 images

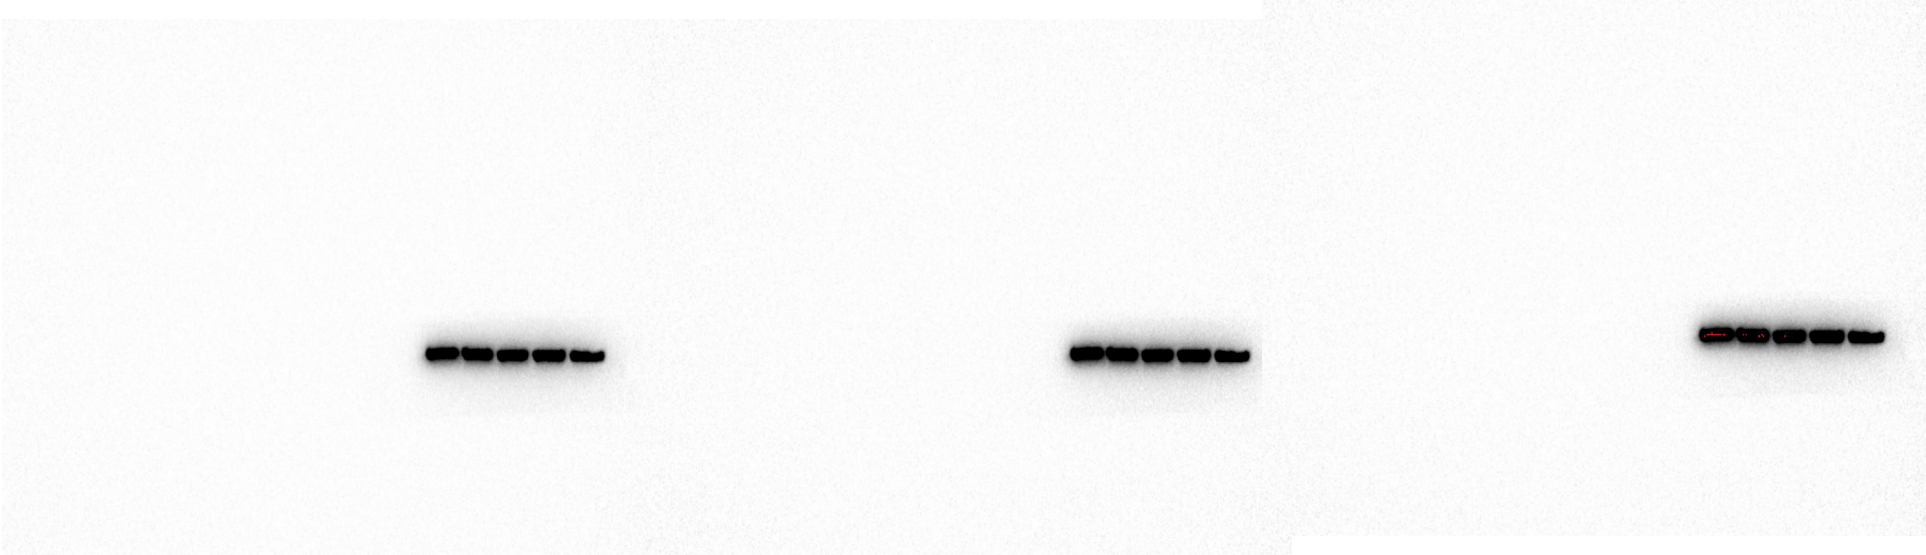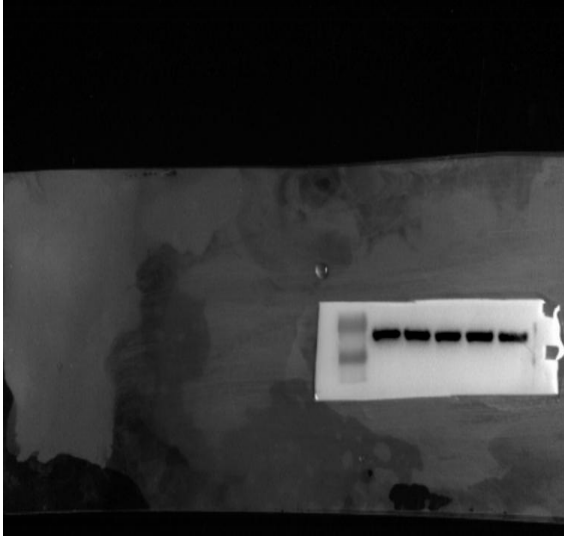

# Original multiple exposure IL-1 $\beta$ images

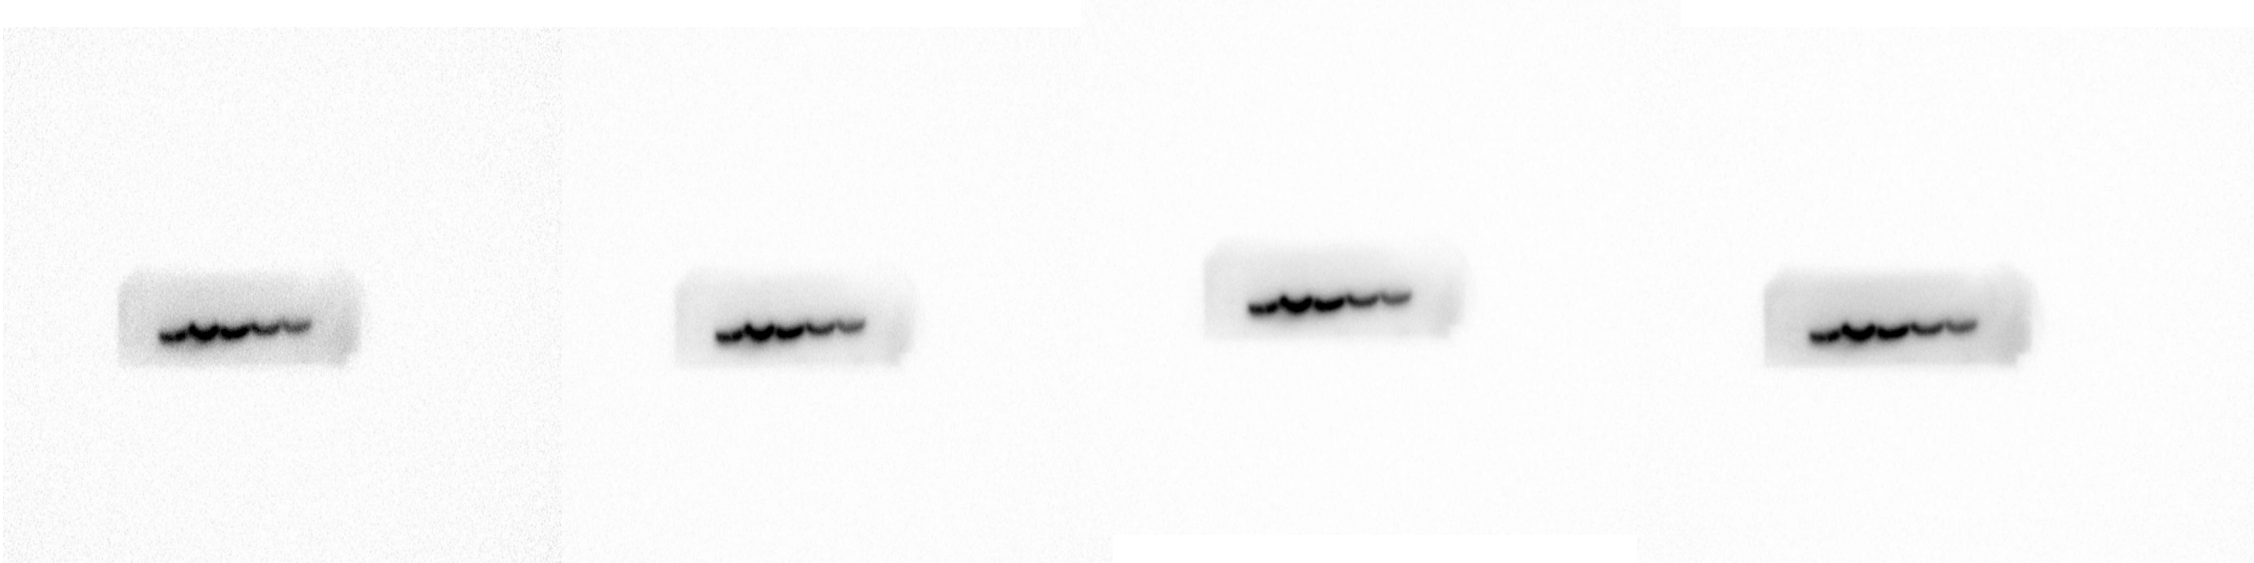

# Original multiple exposure TLR-4 images

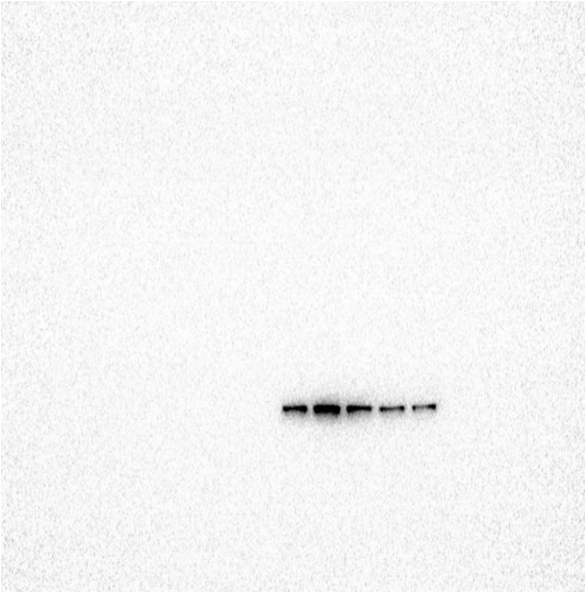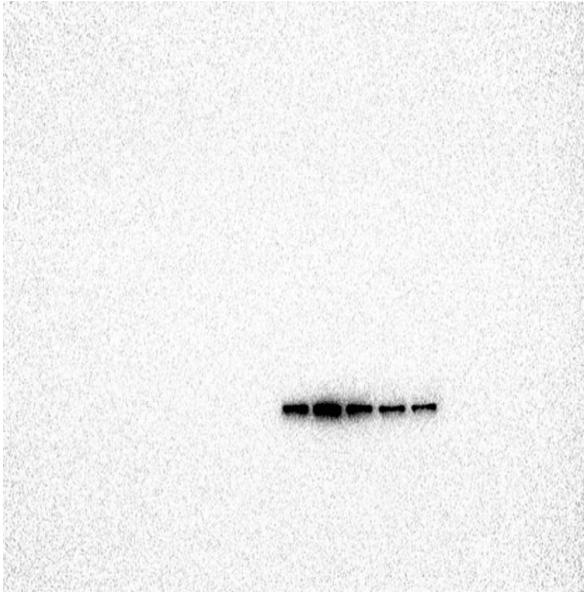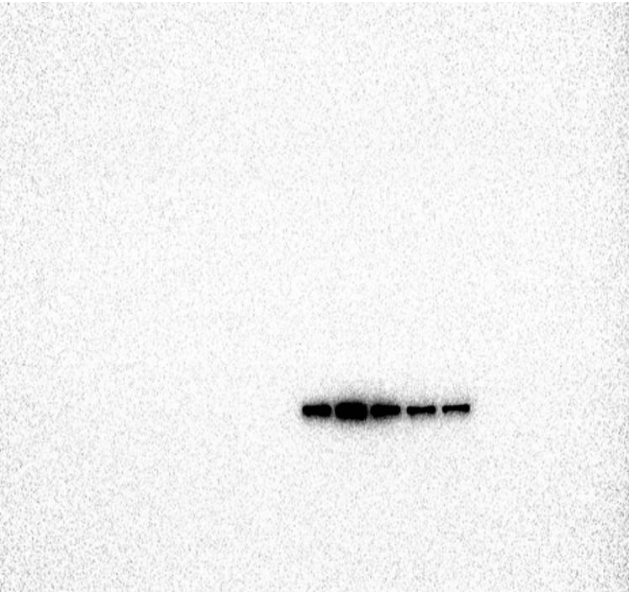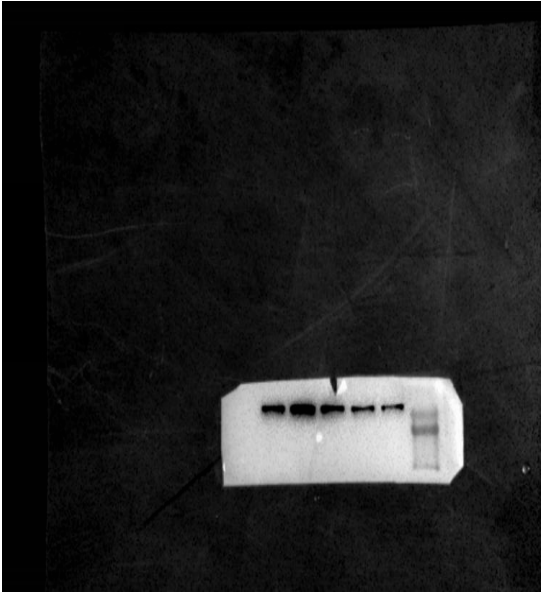

Supplement: 12902_2020_617_MOESM1_ESM.pdf [file 12902_2020_617_MOESM1_ESM.pdf]
